# Supplementary material for: Unraveling the evolution of exsolved Fe–Ni alloy nanoparticles in Ni-doped La0.3Ca0.7Fe0.7Cr0.3O3−δ and their role in enhancing CO2–CO electrocatalysis
Source: Royal Society of Chemistry journal article supplement (doi:10.1039/d1ta07552g), 2021-10-13
Supplement: d1ta07552g1.pdf [file d1ta07552g1.pdf]

## Supporting Information

### Unraveling the evolution of exsolved Fe-Ni alloy nanoparticles in Ni-doped $\text{La}_{0.3}\text{Ca}_{0.7}\text{Fe}_{0.7}\text{Cr}_{0.3}\text{O}_{3-\delta}$ and their role in enhancing $\text{CO}_2\text{-CO}$ electrocatalysis

Haris Masood Ansari,<sup>a</sup> Adam Stuart Bass,<sup>a</sup> Nabeel Ahmad,<sup>b</sup> and Viola I. Birss<sup>\*a</sup>

<sup>a</sup>Department of Chemistry, University of Calgary, 2500 University Dr. NW, Calgary, AB T3G5V2, Canada,

\*Email: birss@ucalgary.ca

<sup>b</sup>Rosalind Franklin Institute, Harwell Campus, Didcot, OX11 0FA, UK

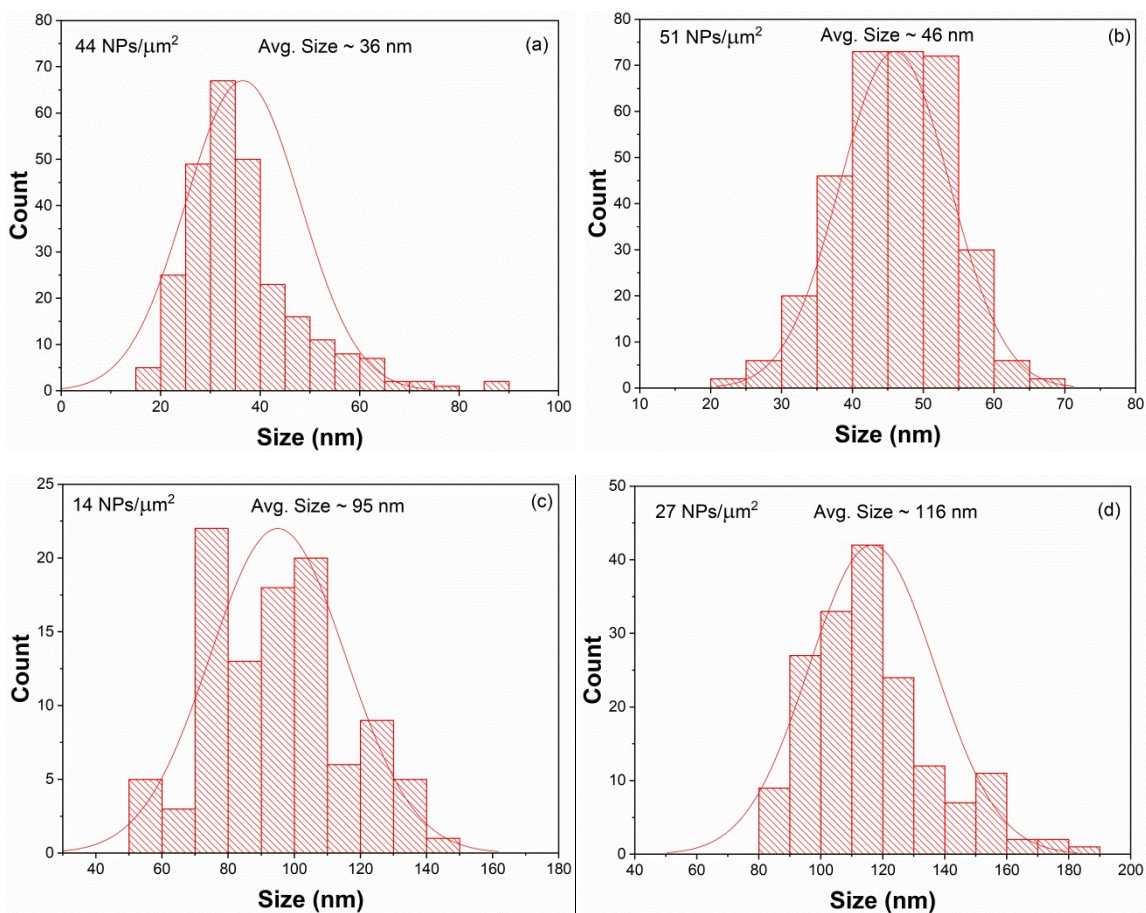

Fig. S1 Histograms depicting the size distribution and areal densities of the NPs grown in 5:95  $\text{H}_2\text{:N}_2$  at (a) 750 °C for 5 hr, (b) 750 °C for 25 hr, (c) 800 °C for 5 hr, and (d) 800 °C for 25 hr, respectively.

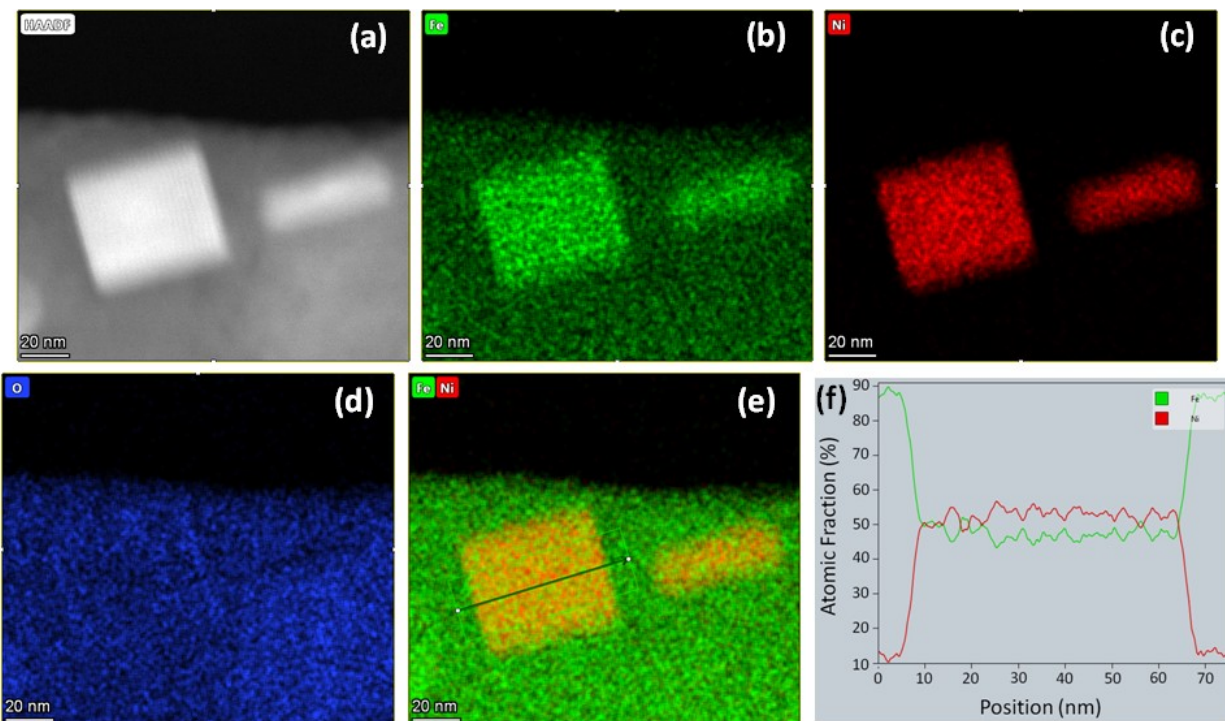

Fig. S2 (a) HAADF STEM image of a faceted NP with a square base. EDS elemental maps of (b) Fe, (c) Ni, and (d) O, and (e) Fe and Ni overlaid, for the NP in (a). (f) EDS line scan across the middle of the NP in (d) showing a stoichiometry close to FeNi. The LCFCrN powder was reduced at 750 °C for 5 hr in 5:95 H<sub>2</sub>:N<sub>2</sub>.

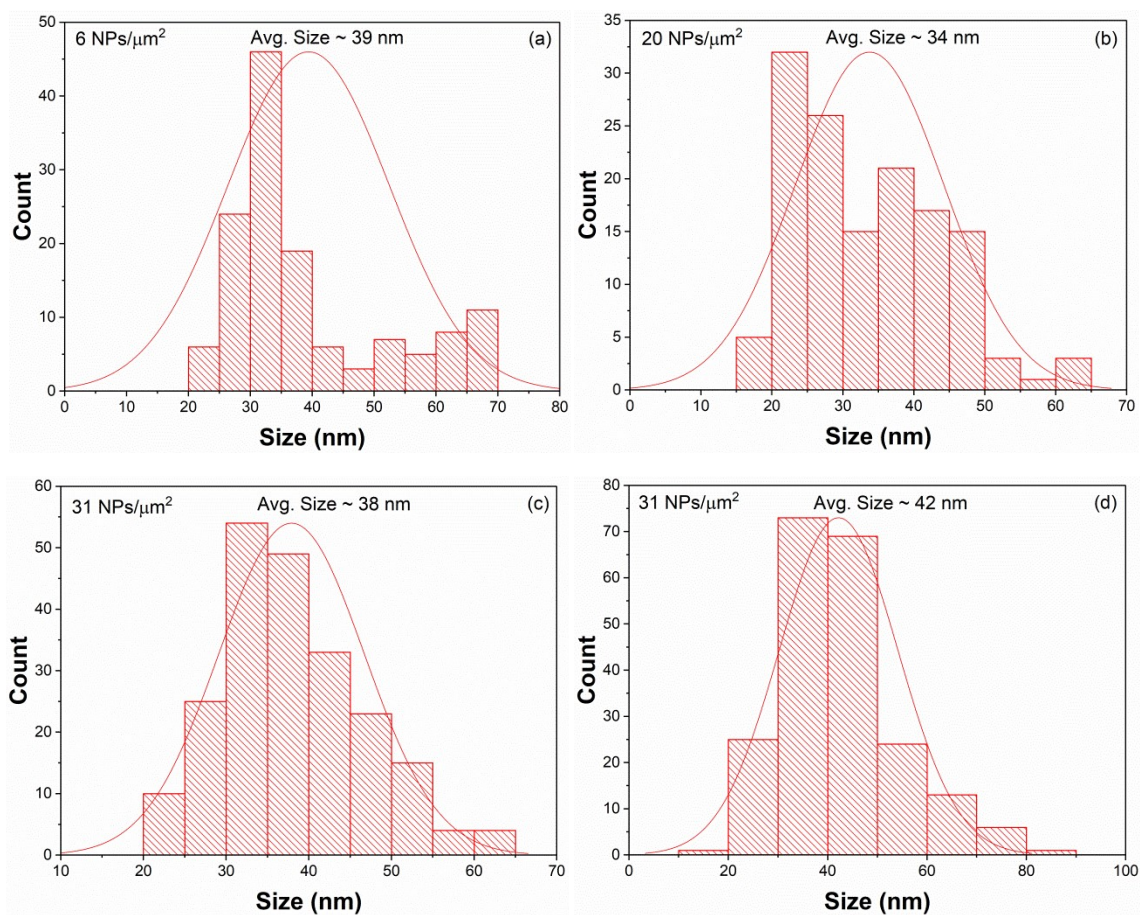

Fig. S3 Histograms depicting the size distribution and areal densities of the NPs grown at 800 °C for 5 hr for CO:CO<sub>2</sub> gas compositions of (a) 10:90, (b) 30:70, (c) 70:30, and (d) 90:10, respectively.

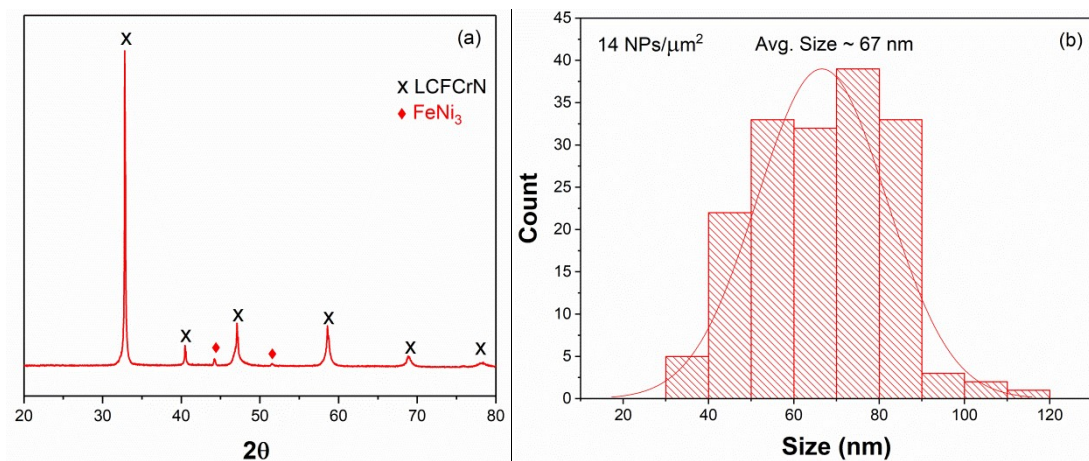

Fig. S4 (a) Room temperature x-ray diffraction pattern, and (b) a histogram depicting the size distribution and areal density of the NPs in LFCrN exposed to humidified 7.5% $\text{H}_2$ :92.5% $\text{N}_2$  at 800 °C for 5 hr.

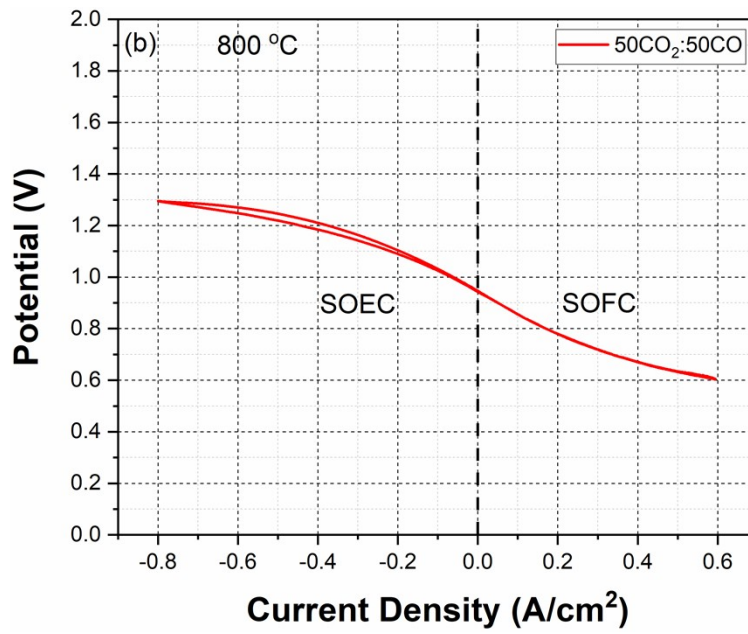

Fig. S5 (a) *iR* corrected CV acquired at 800 °C in a 50:50 CO<sub>2</sub>:CO gas mixture.

Table S1.  $pO_2$  of the gas compositions used in this work

| Gas Composition                                    | $pO_2$ (atm)          |
|----------------------------------------------------|-----------------------|
| 5:95 H <sub>2</sub> :N <sub>2</sub>                | $< 10^{-23}$          |
| Humidified 7.5:92.5 H <sub>2</sub> :N <sub>2</sub> | $7.0 \times 10^{-20}$ |
| 5:95 CO:CO <sub>2</sub>                            | $1.4 \times 10^{-16}$ |
| 10:90 CO:CO <sub>2</sub>                           | $3.1 \times 10^{-17}$ |
| 30:70 CO:CO <sub>2</sub>                           | $2.1 \times 10^{-18}$ |
| 50:50 CO:CO <sub>2</sub>                           | $3.8 \times 10^{-19}$ |
| 70:30 CO:CO <sub>2</sub>                           | $6.9 \times 10^{-20}$ |
| 90:10 CO:CO <sub>2</sub>                           | $4.7 \times 10^{-21}$ |
| 95:5 CO:CO <sub>2</sub>                            | $1.0 \times 10^{-21}$ |

Table S2. Performance comparison of various electrocatalysts for CO<sub>2</sub> reduction at 800 °C.

| Fuel Electrode              | Electrolyte/Oxygen Electrode | Cell Voltage (V) | Gas Atmosphere            | Current Density (A/cm <sup>2</sup> ) | Ref.      |
|-----------------------------|------------------------------|------------------|---------------------------|--------------------------------------|-----------|
| Fe-Ni@LCFCrN                | SSZ/LCFCrN                   | 1.6              | CO <sub>2</sub>           | -0.65                                | This work |
| FeNi <sub>3</sub> @SFMN-GDC | LSGM/LSCF-GDC                | 1.6              | CO <sub>2</sub>           | -0.93                                | [1]       |
| SFMN-GDC                    | LSGM/LSCF-GDC                | 1.6              | CO <sub>2</sub>           | -0.63                                | [1]       |
| LSFV-GDC                    | YSZ/ LSM-YSZ                 | 1.6              | CO <sub>2</sub>           | -0.62                                | [2]       |
| Ni@LSTMN-SDC                | YSZ/LSM                      | 1.6              | CO <sub>2</sub>           | -0.54                                | [3]       |
| Fe-Ni@LSFN-GDC              | YSZ/LSCF-GDC                 | 1.6              | 70:30 CO <sub>2</sub> :CO | -0.66                                | [4]       |

*Note that our perovskite material (LCFCrN) is the only one that has not been composited with GDC or SDC, done by others to increase the ionic conductivity.*

## References

1. H. Lv, L. Lin, X. Zhang, D. Gao, Y. Song, Y. Zhou, Q. Liu, G. Wang, X. Bao, In Situ Exsolved FeNi<sub>3</sub> Nanoparticles on Nickel Doped Sr<sub>2</sub>Fe<sub>1.5</sub>Mo<sub>0.5</sub>O<sub>6-δ</sub> Perovskite for Efficient Electrochemical CO<sub>2</sub> Reduction Reaction, *J. Mater. Chem. A*, 2019, **7**, 11967-11975.
2. Y. Zhou, Z. Zhou, Y. Song, X. Zhang, F. Guan, H. Lv, Q. Liu, S. Miao, G. Wang, X. Bao, Enhancing CO<sub>2</sub> Electrolysis Performance with Vanadium-Doped Perovskite Cathode in Solid Oxide Electrolysis Cell, *Nano Energ.*, 2018, **50**, 43-51.
3. L. Ye, M. Zhang, P. Huang, G. Guo, M. Hong, C. Li, J. T. S. Irvine, K. Xie, Enhancing CO<sub>2</sub> Electrolysis through Synergistic Control of Non-Stoichiometry and Doping to Tune Cathode Surface Structures, *Nat. Commun.*, 2017, **8**, 14785.
4. S. Liu, Q. Liu, J.-L. Luo, Highly Stable and Efficient Catalyst with in Situ Exsolved Fe-Ni Alloy Nanospheres Socketed on an Oxygen Deficient Perovskite for Direct CO<sub>2</sub> Electrolysis, *ACS Catal.*, 2016, **6**, 6219-6228.
